# Supplementary material
Source: PubMed Central journal article supplement (PMC3354733)
Supplement: NIHMS334551-supplement-Supplementary_Data.pdf [file NIHMS334551-supplement-Supplementary_Data.pdf]

Supplemental Table 1. Balance by arm on selected enrollment characteristics for the ITT cohort

| Variable                             | HPV arm |      | Havrix arm |      | P (chi square) |
|--------------------------------------|---------|------|------------|------|----------------|
|                                      | n       | %    | n          | %    |                |
| <b>Total randomized</b>              | 3727    | 49.9 | 3739       | 50.1 | 0.89           |
| <b>Age</b>                           |         |      |            |      |                |
| 18-19                                | 1193    | 32.0 | 1244       | 33.3 | 0.39           |
| 20-21                                | 946     | 25.4 | 905        | 24.2 |                |
| 22-23                                | 818     | 22.0 | 848        | 22.7 |                |
| 24-25                                | 770     | 20.7 | 742        | 19.8 |                |
| <b>Study clinic:</b>                 |         |      |            |      |                |
| Liberia                              | 675     | 18.1 | 698        | 18.7 | 0.44           |
| Nicoya                               | 660     | 17.7 | 637        | 17.0 |                |
| Santa cruz                           | 634     | 17.0 | 577        | 15.4 |                |
| Cañas                                | 746     | 20.0 | 786        | 21.0 |                |
| La Cruz                              | 220     | 5.9  | 245        | 6.6  |                |
| Tilaran                              | 252     | 6.8  | 255        | 6.8  |                |
| Puntarenas                           | 540     | 14.5 | 541        | 14.5 |                |
| <b>HPV 16</b>                        |         |      |            |      |                |
| Not tested                           | 776     | 20.8 | 819        | 21.9 | 0.05           |
| Negative                             | 2729    | 73.2 | 2654       | 71.0 |                |
| Positive                             | 222     | 6.0  | 266        | 7.1  |                |
| <b>HPV 18</b>                        |         |      |            |      |                |
| Not tested                           | 776     | 20.8 | 819        | 21.9 | 0.52           |
| Negative                             | 2856    | 76.6 | 2827       | 75.6 |                |
| Positive                             | 95      | 2.6  | 93         | 2.5  |                |
| <b>HPV 31, 33, 45</b>                |         |      |            |      |                |
| Not tested                           | 776     | 20.8 | 819        | 21.9 | 0.51           |
| Negative                             | 2727    | 73.2 | 2694       | 72.1 |                |
| Positive                             | 224     | 6.0  | 226        | 6.0  |                |
| <b>Any oncogenic HPV</b>             |         |      |            |      |                |
| Not tested                           | 776     | 20.8 | 819        | 21.9 | 0.50           |
| Negative                             | 1909    | 51.2 | 1878       | 50.2 |                |
| Positive                             | 1042    | 28.0 | 1042       | 27.9 |                |
| <b>Cytology*</b>                     |         |      |            |      |                |
| Not tested / No result               | 790     | 21.2 | 833        | 22.3 | 0.40           |
| Normal                               | 2492    | 66.9 | 2497       | 66.8 |                |
| LSIL (inc ASCUS +)                   | 385     | 10.3 | 359        | 9.6  |                |
| HSIL                                 | 60      | 1.6  | 50         | 1.3  |                |
| <b>Total visits post enrollment:</b> |         |      |            |      |                |
| 0-1                                  | 205     | 5.5  | 202        | 5.4  | 0.17           |
| 2-3                                  | 210     | 5.6  | 207        | 5.5  |                |
| 4-5                                  | 2136    | 57.3 | 2050       | 54.8 |                |
| 6-7                                  | 728     | 19.5 | 779        | 20.8 |                |
| 8+                                   | 448     | 12.0 | 501        | 13.4 |                |
| <b>Person time FITT (HPV 16, 18)</b> |         |      |            |      |                |
| <10 mo                               | 232     | 6.2  | 217        | 5.8  | 0.25           |
| 10-<22 mo                            | 182     | 4.9  | 196        | 5.2  |                |
| 22-<34 mo                            | 135     | 3.6  | 175        | 4.7  |                |
| 34-<46 mo                            | 1037    | 27.8 | 1028       | 27.5 |                |
| 46-<58 mo                            | 2052    | 55.1 | 2027       | 54.2 |                |
| 58+ mo                               | 89      | 2.4  | 96         | 2.6  |                |

Supplemental Table 2. Vaccine efficacy against 1 year persistence with individual HPV types (ATP analysis)

| Arm               | Number of women | Number of women with events | Rate per 100 women | (95% CI)   | Rate reduction/100 women | (95% CI)   | Vaccine Efficacy | (95% CI)      |
|-------------------|-----------------|-----------------------------|--------------------|------------|--------------------------|------------|------------------|---------------|
| <b>A9 species</b> |                 |                             |                    |            |                          |            |                  |               |
| <b>HPV 16</b>     |                 |                             |                    |            |                          |            |                  |               |
| Vaccine           | 2464            | 8                           | 0.3                | (0.2, 0.6) | 2.1                      | (1.6, 2.4) | 86.5%            | (72.9, 94.0)  |
| Control           | 2452            | 59                          | 2.4                | (1.9, 3.1) |                          |            |                  |               |
| <b>HPV 31</b>     |                 |                             |                    |            |                          |            |                  |               |
| Vaccine           | 2525            | 21                          | 0.8                | (0.5, 1.2) | 0.7                      | (0.1, 1.2) | 45.7%            | (8.2, 68.6)   |
| Control           | 2546            | 39                          | 1.5                | (1.1, 2.1) |                          |            |                  |               |
| <b>HPV 33</b>     |                 |                             |                    |            |                          |            |                  |               |
| Vaccine           | 2596            | 8                           | 0.3                | (0.1, 0.6) | 0.2                      | (-0.2,0.5) | 37.3%            | (-51.4, 75.3) |
| Control           | 2645            | 13                          | 0.5                | (0.3, 0.8) |                          |            |                  |               |
| <b>HPV 35</b>     |                 |                             |                    |            |                          |            |                  |               |
| Vaccine           | 2593            | 11                          | 0.4                | (0.2, 0.7) | 0.1                      | (-0.3,0.4) | 14.1%            | (-94.0, 62.5) |
| Control           | 2631            | 13                          | 0.5                | (0.3, 0.8) |                          |            |                  |               |
| <b>HPV 52</b>     |                 |                             |                    |            |                          |            |                  |               |
| Vaccine           | 2456            | 60                          | 2.4                | (1.9, 3.1) | -0.4                     | (-1.2,0.4) | -20.0%           | (-74.9, 17.4) |
| Control           | 2505            | 51                          | 2.0                | (1.5, 2.6) |                          |            |                  |               |
| <b>HPV 58</b>     |                 |                             |                    |            |                          |            |                  |               |
| Vaccine           | 2551            | 23                          | 0.9                | (0.6, 1.3) | -0.1                     | (-0.6,0.5) | -6.3             | (-92.4, 41.1) |
| Control           | 2595            | 22                          | 0.8                | (0.5, 1.3) |                          |            |                  |               |
| <b>A7 species</b> |                 |                             |                    |            |                          |            |                  |               |
| <b>HPV 18</b>     |                 |                             |                    |            |                          |            |                  |               |
| Vaccine           | 2567            | 0                           | 0.0                | (0.0, 0.1) | 1.3                      | (1.1, 1.3) | 100.0%           | (90.7, 100.0) |
| Control           | 2593            | 34                          | 1.3                | (0.9, 1.8) |                          |            |                  |               |

Supplemental Table 2. Vaccine efficacy against 1 year persistence with individual HPV types (ATP analysis) “(continued).”

| Arm                                              | Number of women | Number of women with events | Rate per 100 women | (95% CI)   | Rate reduction/100 women | (95% CI)     | Vaccine Efficacy | (95% CI)       |
|--------------------------------------------------|-----------------|-----------------------------|--------------------|------------|--------------------------|--------------|------------------|----------------|
| <b>HPV 45</b>                                    |                 |                             |                    |            |                          |              |                  |                |
| Vaccine                                          | 2573            | 8                           | 0.3                | (0.1, 0.6) | 0.3                      | (-0.0, 0.6)  | 52.0%            | (-9.8, 80.4)   |
| Control                                          | 2622            | 17                          | 0.6                | (0.4, 1.0) |                          |              |                  |                |
| <b>HPV 39</b>                                    |                 |                             |                    |            |                          |              |                  |                |
| Vaccine                                          | 2528            | 24                          | 0.9                | (0.6, 1.4) | -0.1                     | (-0.6, 0.5)  | -6.5%            | (-90.2, 40.2)  |
| Control                                          | 2581            | 23                          | 0.9                | (0.6, 1.3) |                          |              |                  |                |
| <b>HPV 59</b>                                    |                 |                             |                    |            |                          |              |                  |                |
| Vaccine                                          | 2576            | 17                          | 0.7                | (0.4, 1.0) | -0.3                     | (-0.6, 0.1)  | -74.0%           | (-295.1, 20.1) |
| Control                                          | 2637            | 10                          | 0.4                | (0.2, 0.7) |                          |              |                  |                |
| <b>HPV 68 – 73 (HPV 73 is not in A7 species)</b> |                 |                             |                    |            |                          |              |                  |                |
| Vaccine                                          | 2519            | 19                          | 0.8                | (0.5, 1.2) | -0.1                     | (-0.5, 0.4)  | -7.9%            | (-108.1, 43.8) |
| Control                                          | 2576            | 18                          | 0.7                | (0.4, 1.1) |                          |              |                  |                |
| <b>A5 species</b>                                |                 |                             |                    |            |                          |              |                  |                |
| <b>HPV 51</b>                                    |                 |                             |                    |            |                          |              |                  |                |
| Vaccine                                          | 2453            | 57                          | 2.3                | (1.8, 3.0) | -0.9                     | (-1.6, -0.1) | -63.9%           | (-150.7, -8.2) |
| Control                                          | 2539            | 36                          | 1.4                | (1.0, 1.9) |                          |              |                  |                |
| <b>A6 species</b>                                |                 |                             |                    |            |                          |              |                  |                |
| <b>HPV 56</b>                                    |                 |                             |                    |            |                          |              |                  |                |
| Vaccine                                          | 2524            | 22                          | 0.9                | (0.6, 1.3) | 0.3                      | (-0.3, 0.8)  | 25.5%            | (-29.2, 57.5)  |
| Control                                          | 2564            | 30                          | 1.2                | (0.8, 1.6) |                          |              |                  |                |
| <b>HPV 66</b>                                    |                 |                             |                    |            |                          |              |                  |                |
| Vaccine                                          | 2521            | 32                          | 1.3                | (0.9, 1.8) | 0.0                      | (-0.6, 0.6)  | 1.3%             | (-61.1, 39.6)  |
| Control                                          | 2565            | 33                          | 1.3                | (0.9, 1.8) |                          |              |                  |                |

Supplemental table 3. Vaccine efficacy against 6 months persistence of different combinations of HPV types.

| HPV Type              | Arm     | ATP analysis <sup>a</sup>     |                             |                             |                                    |                       | ITT analysis <sup>b</sup>     |                             |                             |                                    |                           |
|-----------------------|---------|-------------------------------|-----------------------------|-----------------------------|------------------------------------|-----------------------|-------------------------------|-----------------------------|-----------------------------|------------------------------------|---------------------------|
|                       |         | Number of women in ATP cohort | Number of women with events | Rate per 100 women (95% CI) | Rate reduction/ 100 women (95% CI) | Efficacy (95% CI)     | Number of women in ITT cohort | Number of women with events | Rate per 100 women (95% CI) | Rate reduction/ 100 women (95% CI) | Vaccine Efficacy (95% CI) |
| HPV 16, 18            | Vaccine | 2635                          | 9                           | 0.3<br>(0.2, 0.6)           | 5.0<br>(4.5, 5.3)                  | 93.6%<br>(88.0, 96.9) | 3727                          | 231                         | 6.2<br>(5.5, 7.0)           | 6.8<br>(5.5, 8.1)                  | 52.3%<br>(44.3, 59.3)     |
|                       | Control | 2677                          | 143                         | 5.3<br>(4.5, 6.2)           |                                    |                       | 3739                          | 486                         | 13.0<br>(12.0, 14.1)        |                                    |                           |
| HPV 31, 33, 45        | Vaccine | 2642                          | 42                          | 1.6<br>(1.2, 2.1)           | 2.4<br>(1.5, 3.1)                  | 60.0%<br>(43.1, 72.7) | 3727                          | 217                         | 5.8<br>(5.1, 6.6)           | 2.7<br>(1.5, 3.9)                  | 31.8%<br>(19.0, 42.6)     |
|                       | Control | 2695                          | 107                         | 4.0<br>(3.3, 4.8)           |                                    |                       | 3739                          | 319                         | 8.5<br>(7.7, 9.5)           |                                    |                           |
| Other oncogenic types | Vaccine | 2643                          | 362                         | 13.7<br>(12.4, 15.1)        | -0.7<br>(-2.7, 1.2)                | -5.5%<br>(-22.3, 8.9) | 3727                          | 942                         | 25.3<br>(23.9, 26.7)        | 0.2<br>(-2.1, 2.5)                 | 0.8%<br>(-8.5, 9.4)       |
|                       | Control | 2697                          | 350                         | 13.0<br>(11.8, 14.3)        |                                    |                       | 3739                          | 953                         | 25.5<br>(24.1, 26.9)        |                                    |                           |
| Any Oncogenic Type    | Vaccine | 2643                          | 400                         | 15.1<br>(13.8, 16.6)        | 2.9<br>(0.7, 5.1)                  | 16.2%<br>(4.3, 26.6)  | 3727                          | 1173                        | 31.5<br>(30.0, 33.0)        | 3.2<br>(0.6, 5.8)                  | 9.1%<br>(1.7, 16.0)       |
|                       | Control | 2697                          | 487                         | 18.1<br>(16.7, 19.6)        |                                    |                       | 3739                          | 1295                        | 34.6<br>(33.1, 36.2)        |                                    |                           |

<sup>a</sup>ATP (according to protocol) cohort includes women who received all 3 doses within protocol – defined windows, complied with the protocol during the vaccination period did not have a biopsy or treatment (LEEP) prior to the 6-month visit and were HPV DNA negative (by PCR) for at least one of the HPV types in the endpoint at enrollment and at the 6-month visit.

<sup>b</sup> ITT (intention to treat) cohort includes all women randomized and vaccinated, regardless of prevalence of infection and follow-up visits.

Supplemental table 4. Vaccine efficacy against 6 months persistence with individual HPV types (ATP analysis)

| Arm               | Number of women | Number of women with events | Rate per 100 women | (95% CI)   | Rate reduction/100 women | (95% CI)    | Vaccine Efficacy | (95% CI)      |
|-------------------|-----------------|-----------------------------|--------------------|------------|--------------------------|-------------|------------------|---------------|
| <b>A9 species</b> |                 |                             |                    |            |                          |             |                  |               |
| <b>HPV 16</b>     |                 |                             |                    |            |                          |             |                  |               |
| Vaccine           | 2464            | 9                           | 0.4                | (0.2, 0.7) | 3.6                      | (3.0, 4.0)  | 90.8%            | (82.4, 95.6)  |
| Control           | 2452            | 97                          | 4.0                | (3.2, 4.8) |                          |             |                  |               |
| <b>HPV 31</b>     |                 |                             |                    |            |                          |             |                  |               |
| Vaccine           | 2525            | 21                          | 0.8                | (0.5, 1.2) | 1.5                      | (0.9, 2.1)  | 64.7%            | (42.6, 78.9)  |
| Control           | 2546            | 60                          | 2.4                | (1.8, 3.0) |                          |             |                  |               |
| <b>HPV 33</b>     |                 |                             |                    |            |                          |             |                  |               |
| Vaccine           | 2596            | 12                          | 0.5                | (0.3, 0.8) | 0.2                      | (-0.2, 0.6) | 32.1%            | (-41.1, 68.2) |
| Control           | 2645            | 18                          | 0.7                | (0.4, 1.1) |                          |             |                  |               |
| <b>HPV 35</b>     |                 |                             |                    |            |                          |             |                  |               |
| Vaccine           | 2593            | 17                          | 0.7                | (0.4, 1.0) | 0.2                      | (-0.3, 0.7) | 25.0%            | (-40.6, 60.6) |
| Control           | 2631            | 23                          | 0.9                | (0.6, 1.3) |                          |             |                  |               |
| <b>HPV 52</b>     |                 |                             |                    |            |                          |             |                  |               |
| Vaccine           | 2456            | 78                          | 3.2                | (2.5, 3.9) | 0.8                      | (-0.3, 1.8) | 19.6%            | (-8.1, 40.4)  |
| Control           | 2505            | 99                          | 4.0                | (3.2, 4.8) |                          |             |                  |               |
| <b>HPV 58</b>     |                 |                             |                    |            |                          |             |                  |               |
| Vaccine           | 2551            | 43                          | 1.7                | (1.2, 2.2) | 0.0                      | (-0.7, 0.8) | 2.8%             | (-48.0, 36.2) |
| Control           | 2595            | 45                          | 1.7                | (1.3, 2.3) |                          |             |                  |               |
| <b>A7 species</b> |                 |                             |                    |            |                          |             |                  |               |
| <b>HPV 18</b>     |                 |                             |                    |            |                          |             |                  |               |
| Vaccine           | 2567            | 0                           | 0.0                | (0.0, 0.1) | 2.1                      | (1.9, 2.1)  | 100.0%           | (94.2, 100.0) |
| Control           | 2593            | 54                          | 2.1                | (1.6, 2.7) |                          |             |                  |               |

Supplemental Table 4. Vaccine efficacy against 6 months persistence with individual HPV types (ATP analysis) “(continued).”

| Arm                                              | Number of women | Number of women with events | Rate per 100 women | (95% CI)   | Rate reduction/100 women | (95% CI)     | Vaccine Efficacy | (95% CI)        |
|--------------------------------------------------|-----------------|-----------------------------|--------------------|------------|--------------------------|--------------|------------------|-----------------|
| <b>HPV 45</b>                                    |                 |                             |                    |            |                          |              |                  |                 |
| Vaccine                                          | 2573            | 9                           | 0.3                | (0.2, 0.6) | 0.9                      | (0.5, 1.3)   | 73.0%            | (45.3, 87.8)    |
| Control                                          | 2622            | 34                          | 1.3                | (0.9, 1.8) |                          |              |                  |                 |
| <b>HPV 39</b>                                    |                 |                             |                    |            |                          |              |                  |                 |
| Vaccine                                          | 2528            | 41                          | 1.6                | (1.2, 2.2) | -0.4                     | (-1.0, 0.3)  | -30.8%           | (-109.2, 17.6)  |
| Control                                          | 2581            | 32                          | 1.2                | (0.9, 1.7) |                          |              |                  |                 |
| <b>HPV 59</b>                                    |                 |                             |                    |            |                          |              |                  |                 |
| Vaccine                                          | 2576            | 28                          | 1.1                | (0.7, 1.5) | -0.3                     | (-0.8, 0.3)  | -30.3%           | (-130.3, 25.6)  |
| Control                                          | 2637            | 22                          | 0.8                | (0.5, 1.2) |                          |              |                  |                 |
| <b>HPV 68 – 73 (HPV 73 is not in A7 species)</b> |                 |                             |                    |            |                          |              |                  |                 |
| Vaccine                                          | 2519            | 36                          | 1.4                | (1.0, 2.0) | 0.1                      | (-0.5, 0.8)  | 8.0%             | (-44.7, 41.6)   |
| Control                                          | 2576            | 40                          | 1.6                | (1.1, 2.1) |                          |              |                  |                 |
| <b>A5 species</b>                                |                 |                             |                    |            |                          |              |                  |                 |
| <b>HPV 51</b>                                    |                 |                             |                    |            |                          |              |                  |                 |
| Vaccine                                          | 2453            | 98                          | 4.0                | (3.3, 4.8) | -1.4                     | (-2.4, -0.4) | -56.1%           | (-114.3, -14.2) |
| Control                                          | 2539            | 65                          | 2.6                | (2.0, 3.2) |                          |              |                  |                 |
| <b>A6 species</b>                                |                 |                             |                    |            |                          |              |                  |                 |
| <b>HPV 56</b>                                    |                 |                             |                    |            |                          |              |                  |                 |
| Vaccine                                          | 2524            | 38                          | 1.5                | (1.1, 2.0) | 0.5                      | (-0.2, 1.2)  | 25.8%            | (-12.7, 51.4)   |
| Control                                          | 2564            | 52                          | 2.0                | (1.5, 2.6) |                          |              |                  |                 |
| <b>HPV 66</b>                                    |                 |                             |                    |            |                          |              |                  |                 |
| Vaccine                                          | 2521            | 59                          | 2.3                | (1.8, 3.0) | 0.0                      | (-0.8, 0.9)  | 1.6%             | (-41.0, 31.3)   |
| Control                                          | 2565            | 61                          | 2.4                | (1.8, 3.0) |                          |              |                  |                 |

Supplemental table 5. Vaccine efficacy (ATP) against 6 months persistence with HPV 16 stratified by HPV 16 and HPV 18 serology at enrollment

| HPV Serology             | Arm     | Number of women | Number of women with events | Rate per 100 women | (95% CI)   | Rate reduction/100 women | (95% CI)    | Vaccine Efficacy | (95% CI)      |
|--------------------------|---------|-----------------|-----------------------------|--------------------|------------|--------------------------|-------------|------------------|---------------|
| HPV 16 serology Negative | Vaccine | 1875            | 4                           | 0.2                | (0.1, 0.5) | 4.4                      | (3.8, 4.7)  | 95.4%            | (88.5, 98.6)  |
|                          | Control | 1856            | 86                          | 4.6                | (3.7, 5.7) |                          |             |                  |               |
| HPV 16 serology Positive | Vaccine | 558             | 5                           | 0.9                | (0.3, 2.0) | 1.1                      | (-0.3, 2.2) | 55.1%            | (-27.3, 85.9) |
|                          | Control | 551             | 11                          | 2.0                | (1.1, 3.4) |                          |             |                  |               |
| HPV 18 serology negative | Vaccine | 1853            | 5                           | 0.3                | (0.1, 0.6) | 3.7                      | (3.1, 4.0)  | 93.1%            | (84.2, 97.6)  |
|                          | Control | 1854            | 73                          | 3.9                | (3.1, 4.9) |                          |             |                  |               |
| HPV 18 serology positive | Vaccine | 563             | 3                           | 0.5                | (0.1, 1.4) | 3.7                      | (2.1, 4.5)  | 87.5%            | (62.1, 97.0)  |
|                          | Control | 541             | 23                          | 4.3                | (2.8, 6.2) |                          |             |                  |               |

ATP (according to protocol) cohort includes women who received all 3 doses within protocol – defined windows, complied with the protocol during the vaccination period did not have a biopsy or treatment (LEEP) prior to the 6-month visit and were HPV DNA negative (by PCR) for at least one of the HPV types in the endpoint at enrollment and at the 6-month visit.

The stratification by HPV 16 serology excludes 31 and 45 subjects without HPV 16 serology results from the vaccine and control arm, respectively

The stratification by HPV 18 serology excludes 48 and 57 subjects without HPV 18 serology from the vaccine and control arm, respectively.

Supplemental table 6. Vaccine efficacy against 6 months persistence with HPV 16/18 stratified by age at enrollment

| Age         | Arm     | ATP analysis <sup>a</sup> |                             |                             |                                   |                           | ITT analysis <sup>b</sup> |                             |                             |                                   |                           |
|-------------|---------|---------------------------|-----------------------------|-----------------------------|-----------------------------------|---------------------------|---------------------------|-----------------------------|-----------------------------|-----------------------------------|---------------------------|
|             |         | Number of women           | Number of women with events | Rate per 100 women (95% CI) | Rate reduction/100 women (95% CI) | Vaccine Efficacy (95% CI) | Number of women           | Number of women with events | Rate per 100 women (95% CI) | Rate reduction/100 women (95% CI) | Vaccine Efficacy (95% CI) |
| 18-19 years | Vaccine | 825                       | 1                           | 0.1 (0.0, 0.6)              | 5.7 (4.9, 6.0)                    | 97.9 (89.4, 99.9)         | 1193                      | 47                          | 3.9 (2.9, 5.2)              | 9.3 (7.2, 11.1)                   | 70.3% (59.2, 78.7)        |
|             | Control | 870                       | 51                          | 5.9 (4.4, 7.6)              |                                   |                           | 1244                      | 165                         | 13.3 (11.5, 15.2)           |                                   |                           |
| 20-21 years | Vaccine | 659                       | 3                           | 0.5 (0.1, 1.2)              | 5.1 (3.7, 5.8)                    | 91.8 (76.1, 98.0)         | 946                       | 64                          | 6.8 (5.3, 8.5)              | 8.0 (5.2, 10.7)                   | 54.3% (38.6, 66.2)        |
|             | Control | 649                       | 36                          | 5.5 (4.0, 7.5)              |                                   |                           | 905                       | 134                         | 14.8 (12.6, 17.2)           |                                   |                           |
| 22-23 years | Vaccine | 588                       | 2                           | 0.3 (0.1, 1.1)              | 5.4 (4.0, 6.0)                    | 94.1 (79.3, 99.0)         | 818                       | 59                          | 7.2 (5.6, 9.1)              | 6.0 (3.0, 8.8)                    | 45.4% (25.3, 60.4)        |
|             | Control | 625                       | 36                          | 5.8 (4.1, 7.8)              |                                   |                           | 848                       | 112                         | 13.2 (11.1, 15.6)           |                                   |                           |
| 24-25 years | Vaccine | 563                       | 3                           | 0.5 (0.1, 1.4)              | 3.2 (1.7, 4.0)                    | 85.8 (56.4, 96.6)         | 770                       | 61                          | 7.9 (6.2, 10.0)             | 2.2 (-0.8, 5.1)                   | 21.6% (-9.9, 44.3)        |
|             | Control | 533                       | 20                          | 3.8 (2.4, 5.6)              |                                   |                           | 742                       | 75                          | 10.1 (8.1, 12.4)            |                                   |                           |

<sup>a</sup>ATP (according to protocol) cohort includes women who received all 3 doses within protocol – defined windows, complied with the protocol during the vaccination period did not have a biopsy or treatment (LEEP) prior to the 6-month visit and were HPV DNA negative (by PCR) for at least one of the HPV types in the endpoint at enrollment and at the 6-month visit.

<sup>b</sup>ITT (intention to treat) cohort includes all women randomized and vaccinated, regardless of prevalence of infection and follow-up visits.



Supplemental table 7. ATP and ITT efficacy estimates against 6 months persistence HPV 16/18 infection by time since first sexual intercourse at enrollment

| Time since first sex | Arm     | ATP analysis <sup>a</sup> |                             |                             |                                    |                           | ITT analysis <sup>b</sup> |                             |                             |                                    |                           |
|----------------------|---------|---------------------------|-----------------------------|-----------------------------|------------------------------------|---------------------------|---------------------------|-----------------------------|-----------------------------|------------------------------------|---------------------------|
|                      |         | Number of women           | Number of women with events | Rate per 100 women (95% CI) | Rate reduction/ 100 women (95% CI) | Vaccine Efficacy (95% CI) | Number of women           | Number of women with events | Rate per 100 women (95% CI) | Rate reduction/ 100 women (95% CI) | Vaccine Efficacy (95% CI) |
| Virgin               | Vaccine | 566                       | 1                           | 0.2<br>(0.0, 0.9)           | 3.9<br>(2.7, 4.2)                  | 95.7%<br>(76.9, 99.8)     | 773                       | 4                           | 0.5<br>(0.2, 1.2)           | 3.6<br>(2.4, 4.3)                  | 87.5%<br>(67.5, 96.2)     |
|                      | Control | 615                       | 25                          | 4.1<br>(2.7, 5.9)           |                                    |                           | 819                       | 34                          | 4.2<br>(2.9, 5.7)           |                                    |                           |
| <2 years             | Vaccine | 227                       | 1                           | 0.4<br>(0.0, 2.2)           | 7.8<br>(4.8, 8.6)                  | 94.6%<br>(70.9, 99.7)     | 352                       | 21                          | 6.0<br>(3.8, 8.8)           | 12.1<br>(7.3, 16.1)                | 67.0%<br>(46.4, 80.2)     |
|                      | Control | 244                       | 20                          | 8.2<br>(5.2, 12.2)          |                                    |                           | 349                       | 63                          | 18.1<br>(14.3, 22.4)        |                                    |                           |
| 2 years              | Vaccine | 233                       | 0                           | 0.0<br>(0.0, 1.3)           | 8.6<br>(6.2, 8.6)                  | 100.0%<br>(83.8, 100.0)   | 335                       | 27                          | 8.1<br>(5.5, 11.4)          | 12.6<br>(7.0, 17.4)                | 60.9%<br>(39.3, 75.3)     |
|                      | Control | 221                       | 19                          | 8.6<br>(5.4, 12.9)          |                                    |                           | 325                       | 67                          | 20.6,<br>(16.5, 25.3)       |                                    |                           |
| 3 years              | Vaccine | 279                       | 1                           | 0.4<br>(0.0, 1.8)           | 5.5<br>(3.0, 6.2)                  | 93.9%<br>(65.8, 99.7)     | 395                       | 28                          | 7.1<br>(4.9, 9.9)           | 8.6<br>(4.0, 12.7)                 | 55.0%<br>(30.1, 71.5)     |
|                      | Control | 256                       | 15                          | 5.9<br>(3.4, 9.3)           |                                    |                           | 394                       | 62                          | 15.7<br>(12.4, 19.6)        |                                    |                           |
| 4+ years             | Vaccine | 1330                      | 6                           | 0.5<br>(0.2, 0.9)           | 4.3<br>(3.4, 4.8)                  | 90.5%<br>(79.4, 96.3)     | 1872                      | 151                         | 8.1<br>(6.9, 9.4)           | 6.0<br>(3.9, 8.0)                  | 42.5%<br>(29.9, 53.1)     |
|                      | Control | 1341                      | 64                          | 4.8<br>(3.7, 6.0)           |                                    |                           | 1852                      | 260                         | 14.0<br>(12.5, 15.7)        |                                    |                           |

<sup>a</sup>ATP (according to protocol) cohort includes women who received all 3 doses within protocol – defined windows, complied with the protocol during the vaccination period did not have a biopsy or treatment (LEEP) prior to the 6-month visit and were HPV DNA negative (by PCR) for at least one of the HPV types in the endpoint at enrollment and at the 6-month visit.

<sup>b</sup> ITT (intention to treat) cohort includes all women randomized and vaccinated, regardless of prevalence of infection and follow-up visits.

Supplemental table 8. ATP and ITT efficacy estimates against HPV 16/18 by number of sexual partners at enrollment

| Number of sex partners | Arm     | ATP analysis <sup>a</sup> |                             |                             |                                   |                           | ITT analysis <sup>b</sup> |                             |                             |                                   |                           |
|------------------------|---------|---------------------------|-----------------------------|-----------------------------|-----------------------------------|---------------------------|---------------------------|-----------------------------|-----------------------------|-----------------------------------|---------------------------|
|                        |         | Number of women           | Number of women with events | Rate per 100 women (95% CI) | Rate reduction/100 women (95% CI) | Vaccine Efficacy (95% CI) | Number of women           | Number of women with events | Rate per 100 women (95% CI) | Rate reduction/100 women (95% CI) | Vaccine Efficacy (95% CI) |
| Virgin                 | Vaccine | 566                       | 1                           | 0.2<br>(0.0, 0.9)           | 3.9<br>(2.7, 4.2)                 | 95.7%<br>(76.9, 99.8)     | 773                       | 4                           | 0.5<br>(0.2, 1.2)           | 3.6<br>(2.4, 4.3)                 | 87.5%<br>(67.5, 96.2)     |
|                        | Control | 615                       | 25                          | 4.1<br>(2.7, 5.9)           |                                   |                           | 819                       | 34                          | 4.2<br>(2.9, 5.7)           |                                   |                           |
| 1 partner              | Vaccine | 904                       | 3                           | 0.3<br>(0.1, 0.9)           | 4.5<br>(3.4, 5.0)                 | 93.1%<br>(80.2, 98.3)     | 1237                      | 65                          | 5.3<br>(4.1, 6.6)           | 5.3<br>(3.1, 7.2)                 | 50.0%<br>(32.9, 63.0)     |
|                        | Control | 915                       | 44                          | 4.8<br>(3.6, 6.3)           |                                   |                           | 1256                      | 132                         | 10.5<br>(8.9, 12.3)         |                                   |                           |
| 2 partners             | Vaccine | 544                       | 2                           | 0.4<br>(0.1, 1.2)           | 5.4<br>(3.9, 6.0)                 | 93.6%<br>(77.4, 99.0)     | 777                       | 67                          | 8.6<br>(6.8, 10.8)          | 9.0<br>(5.5, 12.3)                | 51.2%<br>(34.7, 63.8)     |
|                        | Control | 519                       | 30                          | 5.8<br>(4.0, 8.0)           |                                   |                           | 753                       | 133                         | 17.7<br>(15.1, 20.5)        |                                   |                           |
| 3+ partners            | Vaccine | 621                       | 3                           | 0.5<br>(0.1, 1.3)           | 6.5<br>(5.0, 7.2)                 | 93.1%<br>(80.2, 98.3)     | 940                       | 95                          | 10.1<br>(8.3, 12.2)         | 10.4<br>(7.0, 13.7)               | 50.8%<br>(37.1, 61.7)     |
|                        | Control | 628                       | 44                          | 7.0<br>(5.2, 9.2)           |                                   |                           | 911                       | 187                         | 20.5<br>(18.0, 23.2)        |                                   |                           |

<sup>a</sup>ATP (according to protocol) cohort includes women who received all 3 doses within protocol – defined windows, complied with the protocol during the vaccination period did not have a biopsy or treatment (LEEP) prior to the 6-month visit and were HPV DNA negative (by PCR) for at least one of the HPV types in the endpoint at enrollment and at the 6-month visit.

<sup>b</sup> ITT (intention to treat) cohort includes all women randomized and vaccinated, regardless of prevalence of infection and follow-up visits.

Supplemental table 9. Rates of 6 months persistent infection with HPV 16/ 18 and vaccine efficacy (ATP and ITT) against HPV 16/18 by time since enrollment

| Time since enroll. | Arm     | ATP analysis <sup>a</sup> |                             |                             |                                    |                           | ITT analysis <sup>b</sup> |                             |                             |                                    |                           |
|--------------------|---------|---------------------------|-----------------------------|-----------------------------|------------------------------------|---------------------------|---------------------------|-----------------------------|-----------------------------|------------------------------------|---------------------------|
|                    |         | Number of women           | Number of women with events | Rate per 100 women (95% CI) | Rate reduction/ 100 women (95% CI) | Vaccine Efficacy (95% CI) | Number of women           | Number of women with events | Rate per 100 women (95% CI) | Rate reduction/ 100 women (95% CI) | Vaccine Efficacy (95% CI) |
| 4-22 mo            | Vaccine | 2183                      | 6                           | 0.3<br>(0.1, 0.6)           | 1.7<br>(1.2, 2.1)                  | 86.3%<br>(69.6, 94.7)     | 3529                      | 207                         | 5.9<br>(5.1, 6.7)           | 2.7<br>(1.5, 3.9)                  | 31.6%<br>(18.4, 42.7)     |
|                    | Control | 2239                      | 45                          | 2.0<br>(1.5, 2.7)           |                                    |                           | 3545                      | 304                         | 8.6<br>(7.7, 9.5)           |                                    |                           |
| 22-34 mo           | Vaccine | 2205                      | 3                           | 0.1<br>(0.0, 0.4)           | 2.6<br>(2.2, 2.8)                  | 95.0%<br>(85.9, 98.8)     | 2797                      | 16                          | 0.6<br>(0.3, 0.9)           | 2.2<br>(1.6, 2.6)                  | 79.1%<br>(64.9, 88.2)     |
|                    | Control | 2232                      | 61                          | 2.7<br>(2.1, 3.5)           |                                    |                           | 2775                      | 76                          | 2.7<br>(2.2, 3.4)           |                                    |                           |
| 34-46 mo           | Vaccine | 1259                      | 0                           | 0.0<br>(0.0, 0.2)           | 2.0<br>(1.5, 2.0)                  | 100.0%<br>(87.3, 100.0)   | 2964                      | 8                           | 0.3<br>(0.1, 0.5)           | 2.3<br>(1.8, 2.6)                  | 89.5%<br>(79.1, 95.3)     |
|                    | Control | 1205                      | 24                          | 2.0<br>(1.3, 2.9)           |                                    |                           | 2847                      | 73                          | 2.6<br>(2.0, 3.2)           |                                    |                           |
| 46+ mo             | Vaccine | 1001                      | 0                           | 0.0<br>(0.0, 0.3)           | 1.3<br>(0.7, 1.3)                  | 100.0%<br>(73.6, 100.0)   | 2085                      | 0                           | 0.0<br>(0.0, 0.1)           | 1.7<br>(1.4, 1.7)                  | 100.0%<br>(90.9, 100.0)   |
|                    | Control | 1018                      | 13                          | 1.3<br>(0.7, 2.1)           |                                    |                           | 1989                      | 33                          | 1.7<br>(1.2, 2.3)           |                                    |                           |

<sup>a</sup> ATP (according to protocol) cohort includes women who received all 3 doses within protocol – defined windows, complied with the protocol during the vaccination period did not have a biopsy or treatment (LEEP) prior to the 6-month visit and were HPV DNA negative (by PCR) for at least one of the HPV types in the endpoint at enrollment and at the 6-month visit.

<sup>b</sup> ITT (intention to treat) cohort includes all women randomized and vaccinated, regardless of prevalence of infection and follow-up visits.

Supplemental table 10. Vaccine efficacy against 1 year persistence of individual HPV types among women positive for the corresponding HPV type at enrollment

| Arm               | Number of women | Number of women with events | Rate per 100 women | (95% CI)     | Rate reduction/ 100 women | (95% CI)      | Vaccine Efficacy | (95% CI)       |
|-------------------|-----------------|-----------------------------|--------------------|--------------|---------------------------|---------------|------------------|----------------|
| <b>A9 species</b> |                 |                             |                    |              |                           |               |                  |                |
| <b>HPV 16</b>     |                 |                             |                    |              |                           |               |                  |                |
| Vaccine           | 142             | 72                          | 50.7               | (42.5, 58.9) | -5.1                      | (-20.5, 10.0) | -11.3%           | (-52.8, 19.1)  |
| Control           | 180             | 82                          | 45.6               | (38.4, 52.9) |                           |               |                  |                |
| <b>HPV 31</b>     |                 |                             |                    |              |                           |               |                  |                |
| Vaccine           | 83              | 41                          | 49.4               | (38.8, 60.1) | -17.8                     | (-35.5, 0.8)  | -56.2%           | (-150.9, 2.1)  |
| Control           | 98              | 31                          | 31.6               | (23.0, 41.3) |                           |               |                  |                |
| <b>HPV 33</b>     |                 |                             |                    |              |                           |               |                  |                |
| Vaccine           | 33              | 9                           | 27.3               | (14.2, 44.2) | -3.3                      | (-26.4, 23.6) | -13.6%           | (-243.1, 60.0) |
| Control           | 25              | 6                           | 24.0               | (10.3, 43.4) |                           |               |                  |                |
| <b>HPV 35</b>     |                 |                             |                    |              |                           |               |                  |                |
| Vaccine           | 33              | 10                          | 30.3               | (16.5, 47.4) | -4.0                      | (-27.9, 19.9) | -15.2%           | (-183.8, 53.3) |
| Control           | 38              | 10                          | 26.3               | (14.2, 41.9) |                           |               |                  |                |
| <b>HPV 52</b>     |                 |                             |                    |              |                           |               |                  |                |
| Vaccine           | 132             | 41                          | 31.1               | (23.6, 39.3) | 7.5                       | (-6.9, 21.5)  | 19.5%            | (-22.0, 47.1)  |
| Control           | 127             | 49                          | 38.6               | (30.4, 47.3) |                           |               |                  |                |
| <b>HPV 58</b>     |                 |                             |                    |              |                           |               |                  |                |
| Vaccine           | 61              | 24                          | 39.3               | (27.7, 52.0) | -9.8                      | (-29.5, 11.1) | -33.3%           | (-149.5, 27.8) |
| Control           | 61              | 18                          | 29.5               | (19.1, 41.8) |                           |               |                  |                |
| <b>A7 species</b> |                 |                             |                    |              |                           |               |                  |                |
| <b>HPV 18</b>     |                 |                             |                    |              |                           |               |                  |                |
| Vaccine           | 58              | 14                          | 24.1               | (14.4, 36.4) | 9.2                       | (-9.9, 26.1)  | 27.6%            | (-40.3, 63.7)  |
| Control           | 69              | 23                          | 33.3               | (23.0, 45.1) |                           |               |                  |                |

Supplemental table 10 “(continued)” Vaccine efficacy against 6 months persistence of individual HPV types among women positive for the corresponding HPV type at enrollment

| Arm                                                   | Number of women | Number of women with events | Rate per 100 women | (95% CI)     | Rate reduction/ 100 women | (95% CI)      | Vaccine Efficacy | (95% CI)       |
|-------------------------------------------------------|-----------------|-----------------------------|--------------------|--------------|---------------------------|---------------|------------------|----------------|
| <b>HPV 45</b>                                         |                 |                             |                    |              |                           |               |                  |                |
| Vaccine                                               | 45              | 14                          | 31.1               | (18.9, 45.7) | 8.9                       | (-16.2, 33.1) | 22.2%            | (-60.9, 62.7)  |
| Control                                               | 40              | 16                          | 40.0               | (25.8, 55.6) |                           |               |                  |                |
| <b>HPV 39</b>                                         |                 |                             |                    |              |                           |               |                  |                |
| Vaccine                                               | 64              | 21                          | 32.8               | (22.2, 45.0) | -4.2                      | (-22.4, 13.7) | -14.8%           | (-110.3, 37.4) |
| Control                                               | 77              | 22                          | 28.6               | (19.3, 39.4) |                           |               |                  |                |
| <b>HPV 59</b>                                         |                 |                             |                    |              |                           |               |                  |                |
| Vaccine                                               | 40              | 6                           | 15.0               | (6.3, 28.6)  | -8.1                      | (-17.9, 9.1)  | -117.5%          | (-1466, 54.0)  |
| Control                                               | 29              | 2                           | 6.9                | (1.2, 21.0)  |                           |               |                  |                |
| <b>HPV 68 – 73 (HPV 73 is not part of A7 species)</b> |                 |                             |                    |              |                           |               |                  |                |
| Vaccine                                               | 75              | 13                          | 17.3               | (10.0, 27.2) | 6.3                       | (-9.0, 21.6)  | 26.7%            | (-60.9, 66.6)  |
| Control                                               | 55              | 13                          | 23.6               | (13.8, 36.2) |                           |               |                  |                |
| <b>A5 species</b>                                     |                 |                             |                    |              |                           |               |                  |                |
| <b>HPV 51</b>                                         |                 |                             |                    |              |                           |               |                  |                |
| Vaccine                                               | 114             | 24                          | 21.1               | (14.3, 29.3) | -0.6                      | (-12.6, 12.0) | -3.0%            | (-90.7, 43.7)  |
| Control                                               | 93              | 19                          | 20.4               | (13.2, 29.5) |                           |               |                  |                |
| <b>A6 species</b>                                     |                 |                             |                    |              |                           |               |                  |                |
| <b>HPV 56</b>                                         |                 |                             |                    |              |                           |               |                  |                |
| Vaccine                                               | 86              | 17                          | 19.8               | (12.4, 29.2) | 2.7                       | (-11.1, 16.3) | 12.1%            | (-72.1, 55.3)  |
| Control                                               | 80              | 18                          | 22.5               | (14.4, 32.6) |                           |               |                  |                |
| <b>HPV 66</b>                                         |                 |                             |                    |              |                           |               |                  |                |
| Vaccine                                               | 63              | 10                          | 15.9               | (8.4, 26.5)  | 2.5                       | (-11.5, 15.2) | 13.8%            | (-95.0, 63.0)  |
| Control                                               | 76              | 14                          | 18.4               | (10.9, 28.3) |                           |               |                  |                |

Supplemental table 11. Vaccine efficacy against 1-year persistence of HPV 16, 18 among women who received their vaccine out of per protocol windows

| Arm                                                              | Number of women | Number of women with events | Rate per 100 women | (95% CI)    | Rate reduction/ 100 women | (95% CI)   | Vaccine Efficacy | (95% CI)     |
|------------------------------------------------------------------|-----------------|-----------------------------|--------------------|-------------|---------------------------|------------|------------------|--------------|
| <b>Analysis similar to ATP but doses outside protocol window</b> |                 |                             |                    |             |                           |            |                  |              |
| Vaccine                                                          | 317             | 1                           | 0.3                | (0.0, 1.5)  | 4.1                       | (2.0, 4.7) | 92.8%            | (59.4, 99.7) |
| Control                                                          | 319             | 14                          | 4.4                | (2.5, 7.1)  |                           |            |                  |              |
| <b>ITT analysis</b>                                              |                 |                             |                    |             |                           |            |                  |              |
| Vaccine                                                          | 321             | 18                          | 5.6                | (3.5, 8.6)  | 4.6                       | (0.2, 8.4) | 44.9%            | (2.8, 69.6)  |
| Control                                                          | 324             | 33                          | 10.2               | (7.2, 13.8) |                           |            |                  |              |

<sup>a</sup>ATP (according to protocol) cohort includes women who received at least one dose outside protocol – defined windows, complied with the protocol during the vaccination period did not have a biopsy or treatment (LEEP) prior to the 6-month visit and were HPV DNA negative (by PCR) for at least one of the HPV types in the endpoint at enrollment and at the 6-month visit.

<sup>b</sup> ITT (intention to treat) cohort includes all women randomized and vaccinated who received at least one dose outside protocol – defined windows, regardless of prevalence of infection and follow-up visits.
